# Supplementary material
Source: Elsevier journal article supplement (https://publikationen.ub.uni-frankfurt.de/files/61449/mmc1.docx)
Supplement: mmc1 [file mmc1.docx]

**9. Appendices**

**9.1 Supplementary Figure Legends**

**Supplementary Figure 1:** *Classical descriptors of acute mastoiditis and quantitative minimum measurement of Hounsfield Units*

Contingency tables depict presence (1) or absence (0) of (A) erosive changes, (B) hypersclerotic changes or (C) subcutaneous edema (1) or abscess (2) as described in detail in the materials and methods section. In D box-whisker blots for the quantitative measurements of minimum HU are shown. Statistical analysis in D was performed applying two-tailed Student’s *t* test.

**9.2 Supplementary Tables**

**Supplementary Table 1:** *Clinical and epidemiological characteristics of included control patients*

| variable | study cohort |
| --- | --- |
| patients*  male  female | 24 (100)  16 (66.7)  8 (33.3) |
| mean age at surgical intervention (years)** | 64.6 (58.4; 70.9) |
| indication for cerebral CT examination  disorder of vigilance  search of unknown fever focus  unresponsive after discontinuation of sedation  suspected stroke or intracranial hemorrhage  septic patient: exclusion of cerebral involvement  epileptic seizure  control of hygroma | 3  3  3  11  2  1  1 |

If not otherwise depicted, the numbers without parenthesis depict absolute numbers.
* Data in round parenthesis are relative values; ** Data in round parenthesis are +/- 95% confidence interval; note: due to mathematical rounding, the summed relative values may differ slightly from 100.
